# Supplementary material for: Hemophagocytic Lymphohistiocytosis Associated with Immunological Checkpoint Inhibitors: A Pharmacovigilance Study
Source: MDPI journal article supplement (doi:10.3390/jcm12051985), 2023-03-02
Supplement: s1 [file s1]

**Supplementary Table S1:** Review of HLH cases associated with ICI treatment reported in literature.

| Study design                   | Patients, gender       | Cancer type                                                                     | ICI                                                                                   | HLH criteria                                                                                                                                                                                                        | HLH treatment                                | Time to onset (days) | Outcome                                                                                          | Reference                      |
|--------------------------------|------------------------|---------------------------------------------------------------------------------|---------------------------------------------------------------------------------------|---------------------------------------------------------------------------------------------------------------------------------------------------------------------------------------------------------------------|----------------------------------------------|----------------------|--------------------------------------------------------------------------------------------------|--------------------------------|
| Case report                    | n=1<br>F/35            | Melanoma                                                                        | Ipilimumab/nivolumab                                                                  | Splenomegaly, cytopenias<br>hypertriglyceridemia,<br>hemophagocytosis, elevated<br>ferritin, and elevated soluble<br>CD25 levels                                                                                    | 1.5 mg/kg of<br>methylpredni-<br>sone        | 21                   | Recovered                                                                                        | Hantel A <i>et al.</i> , 2018  |
| Case report                    | n=1<br>F/52            | Metastatic melanoma                                                             | Ipilimumab                                                                            | Fever, hepatitis, pancytopenia,<br>disseminated intravascular<br>Coagulation<br>Ferritin elevated, triglyceride<br>elevated                                                                                         | Methylpredni-<br>solone,<br>Etoposide        | 56                   | Fatal outcome                                                                                    | Michot JM <i>et al.</i> , 2018 |
| Case report                    | n=1,<br>M/58           | Metastatic melanoma                                                             | Pembrolizumab                                                                         | Fever, anemia,<br>thrombocytopenia,<br>hypertriglyceridemia,<br>hyperferritinemia<br>reduced NK cell activity,<br>elevated sCD163 levels                                                                            | Oral prednisone                              | 31                   | Recovered<br>from HLH,<br>permanently<br>stopped<br>pembrolizuma<br>b                            | Sadaat M <i>et al.</i> , 2018  |
| Case report                    | n=1<br>F/36            | Melanoma                                                                        | Ipilimumab/nivolumab                                                                  | Fever, increased soluble IL-2R<br>(CD25), hepatitis, activation of<br>resident von Kupffer<br>macrophages, pancytopenia,<br>hyperferritinemia<br>hypofibrinogenemia                                                 | Prednisone,<br>mycophenolate<br>mofetil      | NR<br>>84            | Recovered                                                                                        | Satzger I <i>et al.</i> , 2018 |
| Case report                    | n=1<br>F/69            | Metastatic melanoma                                                             | Ipilimumab/nivolumab                                                                  | Fever, hepatosplenomegaly,<br>anemia, thrombocytopenia,<br>hyperferritinemia,<br>hypofibrinogenemia,<br>hypertriglyceridemia,<br>hemophagocytosis, elevated<br>soluble CD25, reduced<br>functional NK cell activity | Methylprednisol<br>one,<br>prednisolone      | NR                   | Recovered<br><br>TSO : four cycle<br>of Ipi/nivo and<br>continued<br>fortnightly on<br>nivolumab | Chin CK <i>et al.</i> , 2019   |
| Pharmaco<br>vigilance<br>study | n=26,<br>77% M         | Melanoma 58%<br>NSCLC 11%<br>Renal cell<br>carcinoma 8%<br>Other/unknown<br>23% | Anti-CTLA-4 50%<br>Anti-CTLA-4+anti-<br>PD-1 8%<br>Anti-PD-1 38%<br>Anti-PD-L1 4%     | Not reported                                                                                                                                                                                                        | Not reported                                 | 26<br>(5–116)        | 46% recovered<br>23% fatal<br>outcome<br>31% not<br>reported                                     | Davis EJ <i>et al.</i> , 2019  |
| Pharmaco<br>vigilance<br>study | n=38<br>24% F<br>76% M | Melanoma 55%<br>Lung cancer 13%<br>Bladder cancer<br>8%<br>Other 24%            | Nivolumab 37%<br>Ipilimumab 18%<br>Pembrolizumab 18%<br>Ipilimumab+nivolu-<br>mab 13% | haematological and<br>coagulation<br>features 15%                                                                                                                                                                   |                                              | 46.9<br>(median)     | Recovered 61%<br>Fatal outcome<br>26%                                                            | Noseda R <i>et al.</i> , 2019  |
| Pharmaco<br>vigilance<br>study | n=5<br>M/54            | Pulmonary<br>sarcomatoid<br>carcinoma                                           | Pembrolizumab                                                                         | Fever, thrombopenia, anemia,<br>hyperferritinaemia                                                                                                                                                                  | Prednisolone                                 | 7                    | Partial control<br>of<br>HLH, dead<br>from<br>cancer                                             | Dupré A <i>et al.</i> , 2020   |
|                                | F/35                   | Melanoma                                                                        | Ipilimumab/nivolumab                                                                  | Pancytopenia,<br>hyperferritinemia,<br>hypertriglyceridemia,<br>hemophagocytosis                                                                                                                                    | Corticosteroids<br>etoposide,<br>tocilizumab | 21                   | progression<br>Hscore 188<br>Partial control<br>of HLH.                                          |                                |
|                                | F/52                   | Melanoma                                                                        | Ipilimumab/nivolumab                                                                  | Fever, pancytopenia,<br>hypofibrinogenemia,<br>hyperferritinemia,<br>hypertriglyceridemia,<br>hemophagocytosis                                                                                                      | Prednisone,<br>etoposide                     | 28                   | Rechallenge<br>Hscore 221<br>Death from<br>HLH with<br>cerebral                                  |                                |
|                                | M/69                   | Melanoma                                                                        |                                                                                       |                                                                                                                                                                                                                     | Corticotherapy                               | 35                   | hemorrhage<br>Hscore 263                                                                         |                                |

|                                           |                                                             |                                                                                             |                                                                                  |                                                                                                                                                                                             |                                             |     |                                                                                                            |                                 |
|-------------------------------------------|-------------------------------------------------------------|---------------------------------------------------------------------------------------------|----------------------------------------------------------------------------------|---------------------------------------------------------------------------------------------------------------------------------------------------------------------------------------------|---------------------------------------------|-----|------------------------------------------------------------------------------------------------------------|---------------------------------|
|                                           | M/27                                                        | Melanoma                                                                                    | Ipilimumab                                                                       | Fever, leukopenia, thrombopenia, hyperferritinemia                                                                                                                                          | Methylprednisolone                          | 28  | Recovered. Rechallenge + Hscore 178                                                                        |                                 |
|                                           |                                                             |                                                                                             | Ipilimumab/nivolumab                                                             | Fever, anemia, hyperferritinemia, hemophagocytosis                                                                                                                                          |                                             |     | Recovered Hscore 247                                                                                       |                                 |
| Case report                               | n=1 M/61                                                    | Head and neck squamous cell carcinoma                                                       | Pembrolizumab                                                                    | Fever, pancytopenia, hepatomegaly, elevated liver enzymes, splenomegaly, hyperferritinemia, hypofibrinogenemia, hypertriglyceridemia, hemophagocytosis, high soluble interleukin-2 receptor | Dexamethasone 10 mg/m2 Etoposide 150 mg/m2  | 298 | Recovered                                                                                                  | Kalmuk J <i>et al.</i> , 2020   |
| Case report                               | n=1 F/69                                                    | Melanoma                                                                                    | Ipilimumab/nivolumab                                                             | Fever, liver dysfunction, anemia, thrombocytopenia, hyperferritinemia, hypofibrinogenemia, hepatosplenomegaly, hemophagocytosis                                                             | Prednisolone 1 mg/kg                        | 42  | Unknown                                                                                                    | Mizuta H <i>et al.</i> , 2020   |
| Case reports                              | n=3, M/42                                                   | Melanoma                                                                                    | Ipilimumab/nivolumab                                                             | Fever, hyperferritinemia, hypofibrinogenemia, hypertriglyceridemia, pancytopenia, elevated liver enzymes, hemophagocytosis                                                                  | Tocilizumab                                 | 51  | Recovered HScore : 319                                                                                     |                                 |
|                                           | M/36                                                        | Melanoma                                                                                    | Nivolumab                                                                        | Fever, hyperferritinemia, hypertriglyceridemia, pancytopenia, splenomegaly, elevated liver enzymes                                                                                          | Tocilizumab                                 | 78  | Recovered Hscore 288                                                                                       | Özdemir BC <i>et al.</i> , 2020 |
|                                           | M/32                                                        | Melanoma                                                                                    | Ipilimumab/nivolumab                                                             | Fever, hyperferritinemia, hypofibrinogenemia, hypertriglyceridemia, pancytopenia, elevated liver enzymes, hemophagocytosis                                                                  | Tocilizumab                                 | 91  | Recovered Hscore 317                                                                                       |                                 |
| Case report                               | n=1 M/54                                                    | Pulmonary metastasis of renal cell carcinoma                                                | Ipilimumab/nivolumab + carbozantinib                                             | Fever, anemia, thrombopenia, elevated liver enzymes, hyperferritinemia, hypofibrinogenemia, hemophagocytosis                                                                                | Methylprednisolone, anakinra                | NR  | Recovered Hscore 202<br>TTO : 6 days after his second infusion of nivolumab/ipilimumab with cabozantinib   | Azari A <i>et al.</i> , 2021    |
| Case report                               | n=1 M 33                                                    | Melanoma                                                                                    | Ipilimumab/nivolumab                                                             | Fever, elevated liver enzymes thrombopenia, hyperbilirubinemia, hepatomegaly, splenomegaly, hyperferritinemia, hypertriglyceridemia                                                         | Prednisone 1mg/kg increased 2mg/kg on day 2 | NR  | Recovered Diagnosed with encephalitis and hepatitis associated with HLH<br>TTO : Post 2 cycles of Ipi/nivo | Ghous G <i>et al.</i> , 2021    |
| Pharmaco vigilance study (FAERS Database) | n=199 M 119 (59.7%) F 69 (34.6%) UK 11 (5.5%) Median age 65 | Melanoma (69, 34.6%), Non-small cell lung cancer (61, 30.6%) Renal cell carcinoma (12, 6%). | Pembrolizumab (60, 30.2%) Nivolumab (54, 27.1%) Ipilimumab/nivolumab (47, 23.6%) | NR                                                                                                                                                                                          | NR                                          | NR  | Death 53 (26.6%) Critical Hospitalization 36 (18.1%) 74 (37.2%) Unknown 36 (18.1%)                         | Grewal US <i>et al.</i> , 2021  |

|                          |                         |                                                                                                |                                                                      |                                                                                                                                                                                                                                                                                                                               |                                                                           |                    |                                                                                      |                                    |
|--------------------------|-------------------------|------------------------------------------------------------------------------------------------|----------------------------------------------------------------------|-------------------------------------------------------------------------------------------------------------------------------------------------------------------------------------------------------------------------------------------------------------------------------------------------------------------------------|---------------------------------------------------------------------------|--------------------|--------------------------------------------------------------------------------------|------------------------------------|
| Multi-center study       | n=2<br>M/69<br>M/56     | NR<br>NR                                                                                       | Nivolumab<br>Ipilimumab/nivolumab                                    | NR<br>NR                                                                                                                                                                                                                                                                                                                      | Corticotherapy<br>Corticotherapy                                          | 252<br>168         | Recovered<br>Recovered                                                               | Kramer R <i>et al.</i> , 2021      |
| Case report              | n=2<br>M/75<br><br>F/60 | Lung cancer<br><br>Lung cancer                                                                 | Pembrolizumab<br><br>Pembrolizumab                                   | Fever, cytopenia, elevated liver enzymes, hyperferritinemia, hemophagocytosis<br><br>Cytopenia, coagulation abnormalities, elevated liver enzymes, hyperferritinemia                                                                                                                                                          | Corticotherapy<br><br>Corticotherapy                                      | 46<br><br>30       | Hscore 175 Recovering<br><br>Hscore 185 Recovering (improved her laboratory finding) | Kurozumi A <i>et al.</i> , 2021    |
| Case report              | n=1<br>M/68             | Metastatic renal cell                                                                          | Nivolumab/ipilimumab                                                 | Fever, splenomegaly, pancytopenia, hyperferritinemia, hypertriglyceridemia, hypofibrinogenemia, high CD25, low NK cell activity                                                                                                                                                                                               | Dexamethasone                                                             | 90                 | Recovered<br>Hscore 233                                                              | Masood A <i>et al.</i> , 2021      |
| Case report              | n=1<br>F                | Melanoma                                                                                       | Nivolumab/ipilimumab                                                 | NA                                                                                                                                                                                                                                                                                                                            | Corticotherapy                                                            |                    | Recovered<br>Positive rechallenge                                                    | Holmes Z <i>et al.</i> , 2022<br>● |
| Case report              | n=1<br>F/80             | Squamous cell carcinoma                                                                        | Pembrolizumab                                                        | Pancytopenia, hepatitis, fever, splenomegaly, hyperferritinemia, hypofibrinogenemia, hypertriglyceridemia, elevated soluble interleukin (IL)-2 receptor, low NK-cell activity                                                                                                                                                 | Corticotherapy<br>tocilizumab and etoposide                               | 180                | Recovered                                                                            | Marar R <i>et al.</i> , 2022       |
| Case report              | n=1<br>M/67             | Lung adenocarcinoma                                                                            | Atezolizumab                                                         | Fever, hepatomegaly, splenomegaly, pancytopenia, hyperferritinemia, hyperbilirubinemia, hypertransaminitis, elevated IL-6 and CD25, hemophagocytosis                                                                                                                                                                          | Dexamethasone, tocilizumab, anakinra, mycophenolate mofetil and etoposide | 14                 | Death, neurological dysfunction<br>Hscore 256                                        | Rubio-Perez J <i>et al.</i> , 2022 |
| Case-report              | n=2<br>F/50<br><br>M/70 | Thymic carcinoma<br><br>No small cell lung cancer                                              | Pembrolizumab<br><br>Pembrolizumab                                   | Fever, splenomegaly, elevated liver enzymes, thrombocytopenia, anemia, hypertriglyceridemia, hypofibrinogenemia, hyperferritinemia, decreased natural killer (NK) and elevated soluble CD25<br>Fever, splenomegaly, elevated liver enzymes, hyperferritinemia, elevated soluble CD25, hypertriglyceridemia, hemophagocytosis, | Dexamethasone, etoposide<br><br>Dexamethasone, etoposide                  | 7<br><br>7         | Recovered<br><br>Recovered EBV+                                                      | Wei Y <i>et al.</i> , 2022         |
| Pharmaco vigilance study | n=190<br>36% M          | Melanoma 40%<br>Lung cancer 22.1%<br>Leukemia 3.7%<br>Renal cancer 5.3%<br>Bladder cancer 2.6% | Nivolumab 21.6%<br>Pembrolizumab 30.5%<br>Ipilimumab/nivolumab 34.2% | NA                                                                                                                                                                                                                                                                                                                            | NA                                                                        | 102 (median, n=50) | Recovered 32.6%<br>Fatal outcome 15.3%                                               | Our series                         |
